# Supplementary material for: Upstream sequence-dependent suppression and AtxA-dependent activation of protective antigens inBacillus anthracis
Source: PeerJ journal article supplement (doi:10.7717/peerj.6718), 2019-04-12

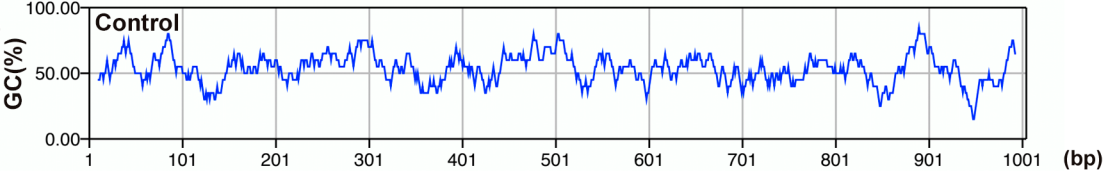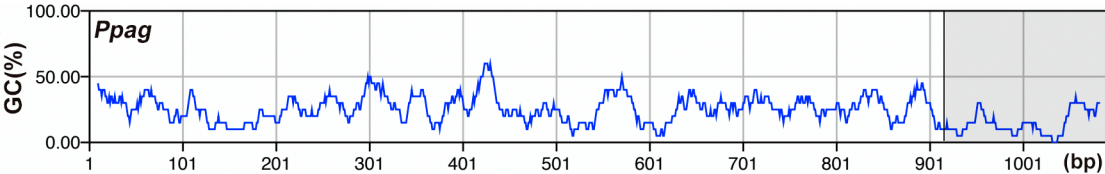

Supplement: atxa_KT_PJ_figS1.pdf [file atxa_KT_PJ_figS1.pdf]
